# Supplementary material
Source: publisher figshare collection journal article supplement (https://gsapubs.figshare.com/ndownloader/files/23302562)

## Conodonts in Silurian hypersaline environments: Specialized and unexpectedly diverse

Jarochovska et al.

Item DR1

TABLE DR1

| Sample  | Beds      | Lithology                                                             | Sample weight [kg] | <i>Ozarkodina confluens</i> | <i>Ozarkodina bohemia</i> | <i>Ozarkodina roopaensis</i> | <i>Ozarkodina soegina</i> | <i>Ozarkodina wimani</i> | <i>Ozarkodina</i> spp. | <i>Wurmiella excavata</i> | <i>Oulodus excavatus</i> | <i>Oulodus siluricus</i> | <i>Ctenognathodus</i> sp. S | <i>Ctenognathodus jeppssoni</i> | <i>Ctenognathodus murchisoni</i> | <i>Ctenognathodus</i> spp. | Unidentified |
|---------|-----------|-----------------------------------------------------------------------|--------------------|-----------------------------|---------------------------|------------------------------|---------------------------|--------------------------|------------------------|---------------------------|--------------------------|--------------------------|-----------------------------|---------------------------------|----------------------------------|----------------------------|--------------|
| EJ-So-5 | Soeginina | Laminated mudstone with regular layers of vugs after gypsum? crystals | 3.125              | 42                          |                           |                              |                           |                          |                        | 4                         |                          | 9                        |                             |                                 |                                  |                            |              |
| EJ-So-4 | Soeginina | Oncoidal floatstone                                                   | 1.35               | 29                          | 1                         | 15                           | 2?                        |                          | 2                      | 3                         | 9                        | 1?                       |                             |                                 |                                  | 8                          | 5            |
| EJ-So-3 | Soeginina | Oncoidal floatstone with gastropods and leperditids                   | 2.23               | 21                          |                           | 11                           | 1                         | 1                        | 1                      |                           | 10                       |                          |                             |                                 |                                  | 11                         | 3            |
| EJ-So-2 | Anikaitse | Floatstone with large (up to 15 cm) chaetetids                        | 4.245              | 11                          | 6                         |                              |                           |                          |                        |                           | 19                       |                          | 72                          |                                 |                                  |                            | 23           |
| EJ-So-1 | Vesiku    | Stromatolite with desiccation cracks and vugs after evaporites        | 2.26               |                             | 24                        |                              |                           |                          | 3                      |                           |                          |                          | 2                           | 1?                              | 1                                | 28                         | 11           |

### Field data

The Soeginina section (Fig. 1; 58°17'20.22" N, 21°50'30.05" E) was sampled for production of slabs, thin sections, and extraction of conodonts. Conodonts were extracted using 7% buffered acetic acid according to the method of Jeppsson et al. (1999). The fraction between 63 µm and 2 mm was retained after sieving. Quantitative data on newly recovered conodonts is given in Supplementary Material S1 and summarized together with previous data from Viira and Einasto (2003) in Figure 1. Illustrated material is hosted at Tallinn University of Technology (GIT-) and Univ. of Erlangen-Nuremberg (EJ-).

### References

References used in the compilation of Homeric-Gorstian conodont occurrences with environmental data are listed below. Only studies explicitly reporting the full taxonomic composition were included. Approximately only half of available publications on Homeric-Gorstian conodonts could be included as the remainder lacked sufficient information on sampled lithology, environment, positions of the samples, or focused on individual taxa and not entire assemblages. The compilation includes assemblages from Laurentia, Baltica, Avalonia, and peri-Gondwanan terranes. Peritidal assemblages were recorded from Baltica (Estonia, Lithuania, Ukraine) and Laurentia (the US).

- Barrick, J. E., 1983, Wenlockian (Silurian) Conodont Biostratigraphy, Biofacies, and Carbonate Lithofacies, Wayne Formation, Central Tennessee: *Journal of Paleontology*, v. 57, no. 2, p. 208-239, doi:10.2307/1304650
- Barrick, J. E., and Klapper, G., 1976, Multielement Silurian (Late Llandoveryan-Wenlockian) conodonts of the Clarita Formation, Arbuckle Mountains, Oklahoma and phylogeny of *Kockelella*: *Geologica et Palaeontologica*, v. 10, p. 59-99,
- Barrick, J. E., Klapper, G., Kleffner, M. A., and Karlsson, H. R., 2010, Conodont biostratigraphy and stable isotope chemostratigraphy of the lower Henryhouse Formation (Gorstian-early Ludfordian, Ludlow, Silurian), southern Oklahoma, USA: *Memoirs of the Association of Australasian Palaeontologists*, v. 39, p. 51-70,
- Barrick, J. E., Kleffner, M. A., and Karlsson, H. R., 2009, Conodont faunas and stable isotopes across the Mulde Event (late Wenlock; Silurian) in southwestern Laurentia (south-central Oklahoma and subsurface West Texas): *Palaeontographica Americana*, v. 62, p. 41-56,
- Calner, M., Eriksson, M. E., Clarkson, E. N. K., and Jeppsson, L., 2008, An atypical intra-platform environment and biota from the Silurian of Gotland, Sweden: *GFF*, v. 130, p. 79-86,
- Calner, M., and Jeppsson, L., 2003, Carbonate platform evolution and conodont stratigraphy during the middle Silurian Mulde Event, Gotland, Sweden: *Geological Magazine*, v. 140, p. 173-203, doi:doi:10.1017/S0016756802007070
- Jarochowska, E., Bremer, O., Heidlas, D., Pröpster, S., Vandenbroucke, T. R. A., and Munnecke, A., 2016a, End-Wenlock terminal Mulde carbon isotope excursion in Gotland, Sweden: Integration of stratigraphy and taphonomy for correlations across restricted facies and specialized faunas: *Palaeogeography, Palaeoclimatology, Palaeoecology*, v. 457, p. 304-322, doi:10.1016/j.palaeo.2016.06.031

- Jarochowska, E., and Munnecke, A., *in press*, Late Wenlock carbon isotope excursions and associated conodont fauna in the Podlasie Depression, eastern Poland: a not-so-big crisis?: *Geological Journal*, doi:10.1002/gj.2674
- Jarochowska, E., Munnecke, A., Frisch, K., Ray, D. C., and Castagner, A., 2016b, Faunal and facies changes through the mid-Homerian (late Wenlock, Silurian) positive carbon isotope excursion in Podolia, western Ukraine: *Lethaia*, v. 49, no. 2, p. 170-798, doi:10.1111/let.12137
- Kříž, J., Dufka, P., Jaeger, H., and Schönlaub, H. P., 1993, The Wenlock/Ludlow Boundary in the Prague Basin (Bohemia): *Jahrbuch der Geologischen Bundesanstalt*, v. 136, no. 4, p. 809-839,
- Männik, P., 2003, Distribution of Ordovician and Silurian conodonts, *in* Põldvere, A., ed., Ruhnu (500) drill core, Volume 5: Tallinn, Geological Survey of Estonia, p. 17-23.
- , 2010, Distribution of Ordovician and Silurian conodonts, *in* Põldvere, A., ed., Viki drill core, Volume 10: Tallinn, Geological Survey of Estonia, p. 21-24.
- Märss, T., and Miller, C. G., 2004, Thelodonts and distribution of associated conodonts from the Llandovery–lowermost Lochkovian of the Welsh Borderland: *Palaeontology*, v. 47, no. 5, p. 1211–1265, doi:10.1111/j.0031-0239.2004.00409.x
- Radzevičius, S., Spiridonov, A., and Brazauskas, A., 2014a, Integrated middle–upper Homerian (Silurian) stratigraphy of the Viduklė-61 well, Lithuania: *GFF*, v. 136, no. 1, p. 218-222, doi:10.1080/11035897.2013.866976
- Radzevičius, S., Spiridonov, A., Brazauskas, A., Dankina, D., Rimkus, A., Bičkauskas, G., Kaminskas, D., Meidla, T., and Ainsaar, L., 2016, Integrated stratigraphy, conodont turnover and palaeoenvironments of the upper Wenlock and Ludlow in the shallow marine succession of the Vilkaviškis-134 core (Lithuania): *Newsletters on Stratigraphy*, v. 49, no. 2, p. 321-336, doi:dx.doi.org/10.1127/nos/2016/0074
- Radzevičius, S., Spiridonov, A., Brazauskas, A., Norkus, A., Meidla, T., and Ainsaar, L., 2014b, Upper Wenlock  $\delta^{13}\text{C}$  chemostratigraphy, conodont biostratigraphy and palaeoecological dynamics in the Ledai-179 drill core (Eastern Lithuania): *Estonian Journal of Earth Sciences*, v. 63, no. 4, p. 293-299, doi:10.3176/earth.2014.33
- Štorch, P., Manda, Š., Slavík, L., and Tasáryová, Z., 2016, Wenlock–Ludlow boundary interval revisited: new insights from the offshore facies of the Prague Synform, Czech Republic: *Canadian Journal of Earth Sciences*, v. 53, no. 7, p. 666-673, doi:10.1139/cjes-2015-0161
- Strömberg, C., 1997, The conodont *Ctenognathodus* in the Silurian of Gotland, Sweden [Masters thesis]: Lund University, 56 p.
- Sullivan, N. B., McLaughlin, P. I., Emsbo, P., Barrick, J. E., and Premo, W. R., *in press*, Identification of the late Homerian Mulde Excursion at the base of the Salina Group (Michigan Basin, USA): *Lethaia*, doi:10.1111/let.12168
- Viira, V., and Aldridge, R. J., 1998, Upper Wenlock to Lower Přídolí (Silurian) conodont biostratigraphy of Saaremaa, Estonia, and a correlation with Britain: *Journal of Micropalaeontology*, v. 17, no. 1, p. 33-50, doi:10.1144/jm.17.1.33
- Viira, V., and Einasto, R., 2003, Wenlock-Ludlow boundary beds and conodonts of Saaremaa Island, Estonia: *Proceedings of the Estonian Academy of Sciences*, v. 52, no. 4, p. 213-238,

### Diversity analysis

All analyses were performed in R Software 3.2.4 (R Core Team, 2016). Occurrences with uncertain identifications (aff., cf., ?) have been removed. Each sample (collection) has been

originally assigned to an environment in the Paleobiology Database (PBDB), based on either direct statement in the original publication or on associated literature (e.g. where the author of the conodont paper referred the reader to another paper for details of regional geology). We recoded these environments to unify redundant classes such as "offshore ramp" and "offshore shelf". This resulted in distinguishing seven successive environments along the onshore-offshore gradient.

Beta diversity was additionally calculated as multivariate dispersion (distance from the centroid of samples within each habitat) using `betadisper()` function of (version 2.3-4, Oksanen et al., 2016).

Because the number of collections varies substantially between environments, we standardized our data by drawing randomly and without replacement 24 samples (the minimum number of samples per habitat) from each environment. This subsampling procedure was repeated 1000 times to obtain mean values and standard errors for all measured statistics.

Subsampled dataset was used to calculate multiplicative diversity partitioning and turnover between environments using Jaccard dissimilarity (e.g. Legendre and Legendre, 1998 and references therein). An alternative approach accounts for the spatial turnover and the nestedness components of beta diversity (Baselga, 2010). This was calculated using the `betapart` package of Baselga and Orme (2012) using Jaccard dissimilarity. The results are shown in Appendix S3.

### Ordination analysis

We used a restricted dataset with assemblages containing more than one species. The metaNMDS (Nonmetric Multidimensional Scaling with Stable Solution from Random Starts, Axis Scaling and Species Scores) procedure implemented in the `vegan` package for R software (version 2.3-4, Oksanen et al., 2016). Distances between assemblages in the final version (Fig. 3) were calculated using Bray-Curtis dissimilarity, but similar results were obtained using Jaccard dissimilarity. Very small dissimilarities were handled by adding a small value. The use of metaNMDS procedure results in centering the dataset so that the origin lies at the average of both axes and rotation with the principal component analysis. Multivariate variation among samples was thus maximized along the first ordination axis, which consequently corresponds to the strongest gradient in the assemblage composition. Axes are scaled in half-change, i.e. one unit means halving of community similarity from replicate similarity. As a result Fig. 3 can be directly interpreted in terms of distance between samples and axes are meaningful (reflect a composition gradient, which in this case corresponds to the peritidal-offshore transect).

### References cited in the appendix

- Baselga, A., 2010, Partitioning the turnover and nestedness components of beta diversity: *Global Ecology and Biogeography*, v. 19, no. 1, p. 134-143, doi:10.1111/j.1466-8238.2009.00490.x
- Baselga, A., and Orme, C. D. L., 2012, `betapart`: an R package for the study of beta diversity: *Methods in Ecology and Evolution*, v. 3, no. 5, p. 808–812.
- Jeppsson, L., Anehus, R., and Fredholm, D., 1999, The optimal acetate buffered acetic acid technique for extracting phosphatic fossils: *Journal of Paleontology*, v. 73, no. 5, p. 964-972, doi:10.2307/1306854
- Legendre, P., and Legendre, L., 1998, *Numerical ecology*, Amsterdam, Elsevier, *Developments in Environmental Modelling*, v. 20, 852 pp.

- Oksanen, J., Blanchet, F. G., Kindt, R., Legendre, P., Michin, P. R., O'Hara, R. B., Simpson, G. L., Solymos, P., Stevens, M. H. H., and Wagner, H., 2016, vegan: Community Ecology Package.
- R Core Team, 2016, R: A Language and Environment for Statistical Computing: Vienna, R Foundation for Statistical Computing.
- Viira, V., and Einasto, R., 2003, Wenlock-Ludlow boundary beds and conodonts of Saaremaa Island, Estonia: Proceedings of the Estonian Academy of Sciences, v. 52, no. 4, p. 213-238

Item DR3 - Results

Number of occurrences per environment

| peritidal | lagoonal/restricted | reef or shoal | shallow subtidal | deep subtidal | offshore | basin |
|-----------|---------------------|---------------|------------------|---------------|----------|-------|
| 49        | 37                  | 32            | 76               | 99            | 59       | 24    |

Sample-level raw ( $\alpha$ ) diversity per environment

Vertical axis shows the number of species. Boxes show the inter-quartile range, the thick line – the mean, whiskers – the total range, and dots – outliers.

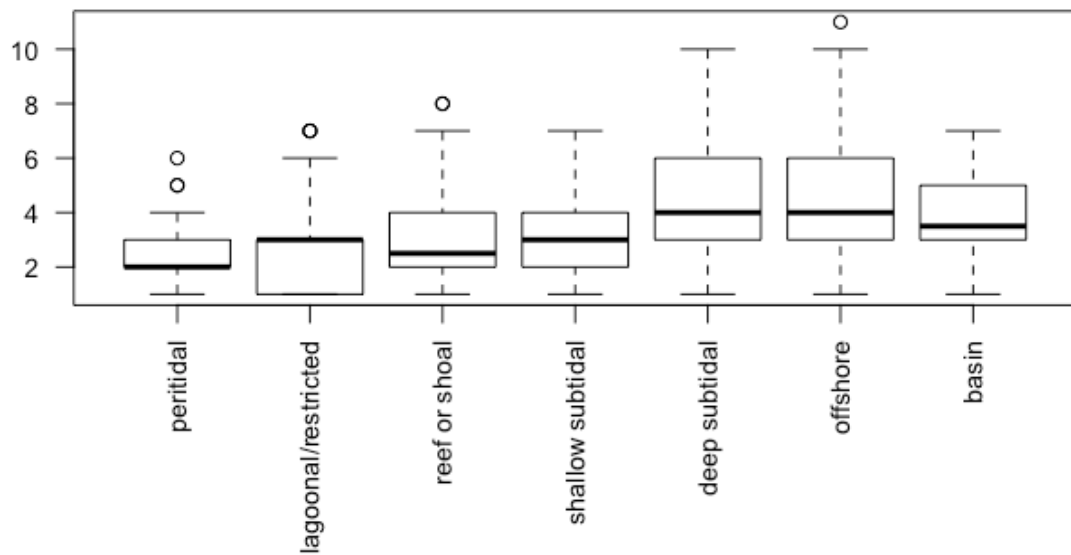

Beta diversity (Jaccard dissimilarity) as pairwise average and as multivariate dispersion

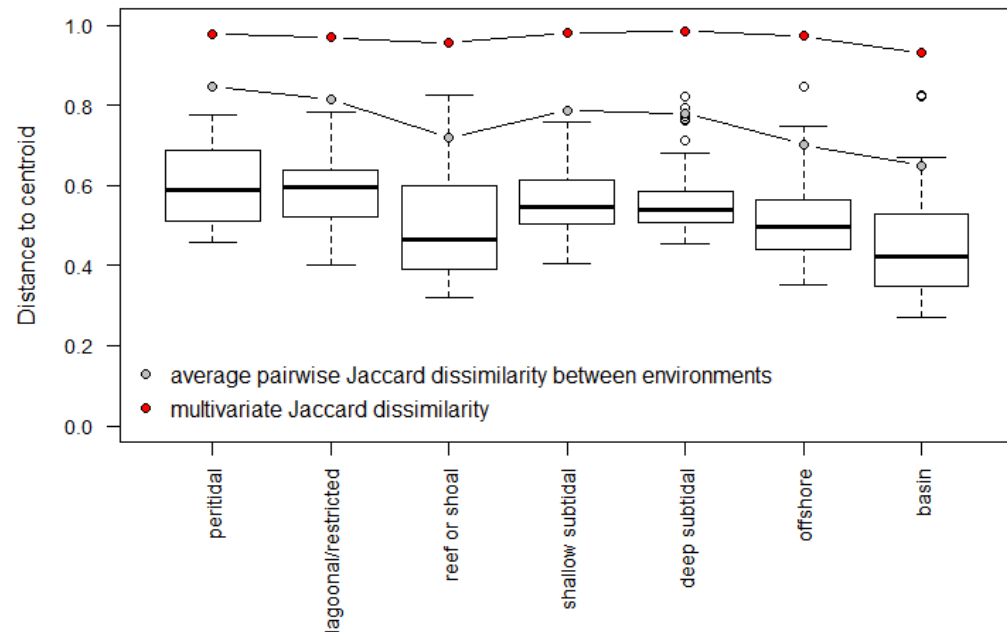

#### ANOVA for beta diversity:

|                  | Df  | Sum of squares | Mean square | F value | P (>F)           |
|------------------|-----|----------------|-------------|---------|------------------|
| <b>Groups</b>    | 6   | 0.5885         | 0.098083    | 9.1846  | <b>2.207e-09</b> |
| <b>Residuals</b> | 369 | 3.9406         | 0.010679    |         |                  |

#### Tukey's correction for multiple comparisons

|                                             | Difference | Lower CI | Upper CI | Adjusted p value |
|---------------------------------------------|------------|----------|----------|------------------|
| <b>lagoonal/restricted-peritidal</b>        | -0.0229    | -0.0896  | 0.0439   | 0.9502           |
| <b>reef or shoal-peritidal</b>              | -0.0943    | -0.1640  | -0.0247  | <b>0.0014</b>    |
| <b>shallow subtidal-peritidal</b>           | -0.0416    | -0.0978  | 0.0145   | 0.2987           |
| <b>deep subtidal-peritidal</b>              | -0.0486    | -0.1021  | 0.0049   | 0.1028           |
| <b>offshore-peritidal</b>                   | -0.0977    | -0.1569  | -0.0385  | <b>0.0000</b>    |
| <b>basin-peritidal</b>                      | -0.1525    | -0.2288  | -0.0762  | <b>0.0000</b>    |
| <b>reef or shoal-lagoonal/restricted</b>    | -0.0715    | -0.1454  | 0.0025   | 0.0659           |
| <b>shallow subtidal-lagoonal/restricted</b> | -0.0188    | -0.0802  | 0.0427   | 0.9716           |
| <b>deep subtidal-lagoonal/restricted</b>    | -0.0258    | -0.0848  | 0.0333   | 0.8548           |
| <b>offshore-lagoonal/restricted</b>         | -0.0749    | -0.1391  | -0.0106  | <b>0.0109</b>    |
| <b>basin-lagoonal/restricted</b>            | -0.1296    | -0.2099  | -0.0493  | <b>0.0001</b>    |
| <b>shallow subtidal-reef or shoal</b>       | 0.0527     | -0.0119  | 0.1173   | 0.1931           |
| <b>deep subtidal-reef or shoal</b>          | 0.0457     | -0.0166  | 0.1080   | 0.3116           |
| <b>offshore-reef or shoal</b>               | -0.0034    | -0.0707  | 0.0639   | 1.0000           |
| <b>basin-reef or shoal</b>                  | -0.0582    | -0.1409  | 0.0246   | 0.3641           |
| <b>deep subtidal-shallow subtidal</b>       | -0.0070    | -0.0537  | 0.0397   | 0.9994           |
| <b>offshore-shallow subtidal</b>            | -0.0561    | -0.1093  | -0.0029  | <b>0.0309</b>    |
| <b>basin-shallow subtidal</b>               | -0.1109    | -0.1826  | -0.0391  | <b>0.0001</b>    |
| <b>offshore-deep subtidal</b>               | -0.0491    | -0.0995  | 0.0013   | <b>0.0616</b>    |
| <b>basin-deep subtidal</b>                  | -0.1039    | -0.1736  | -0.0342  | <b>0.0003</b>    |
| <b>basin-offshore</b>                       | -0.0548    | -0.1289  | 0.0194   | 0.3041           |

#### Resampled diversity

|                            | Alpha | Beta | Gamma |
|----------------------------|-------|------|-------|
| <b>peritidal</b>           | 2.5   | 6.6  | 16.5  |
| <b>lagoonal/restricted</b> | 2.8   | 5.5  | 15.5  |
| <b>reef or shoal</b>       | 3.3   | 4.6  | 15.1  |
| <b>shallow subtidal</b>    | 3.1   | 5.1  | 16.1  |
| <b>deep subtidal</b>       | 4.4   | 5.2  | 22.7  |
| <b>offshore</b>            | 4.7   | 3.8  | 17.5  |
| <b>basin</b>               | 3.8   | 3.7  | 14.0  |

## Pairwise turnover between environments

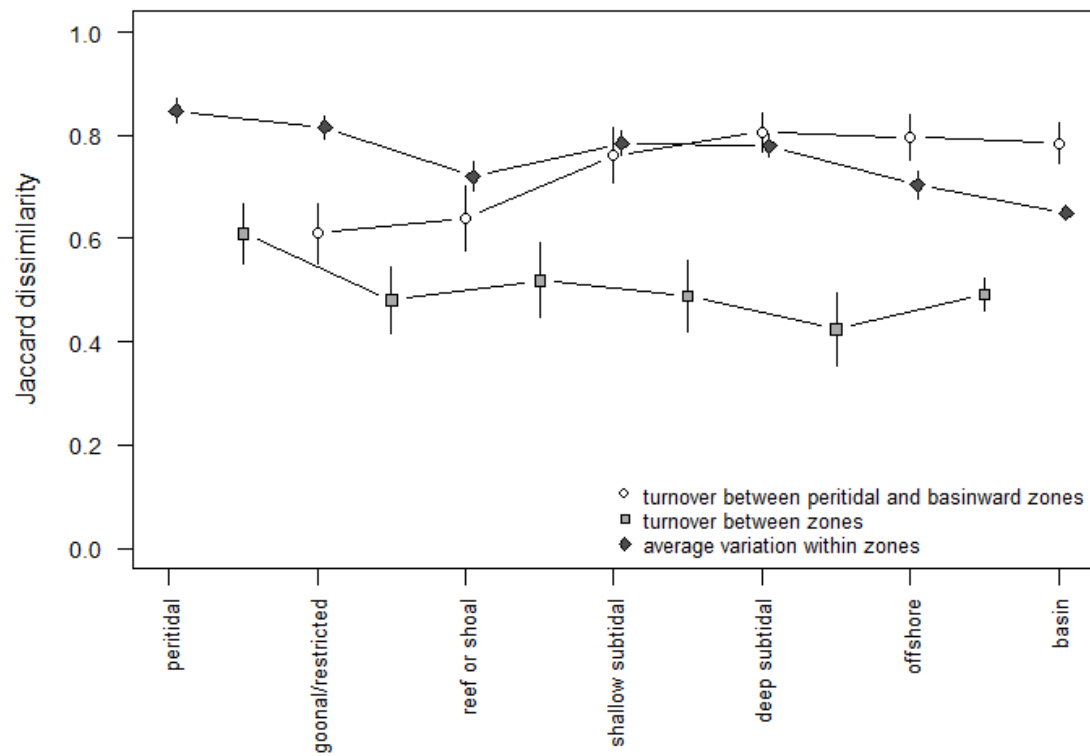



### Distribution of niche breadth within each environment

Niche breadth is expressed as a unitless value ranging from 0 to 1. It weights the range along the onshore-offshore gradient by frequency of samples in each environment and the relative frequency of the species in this environment. For two species occurring in the same number of environments, it will be lower (narrower niche) for the one which is mostly concentrated in one of them, and higher (wider niche) for the one which is uniformly distributed across all these environments.

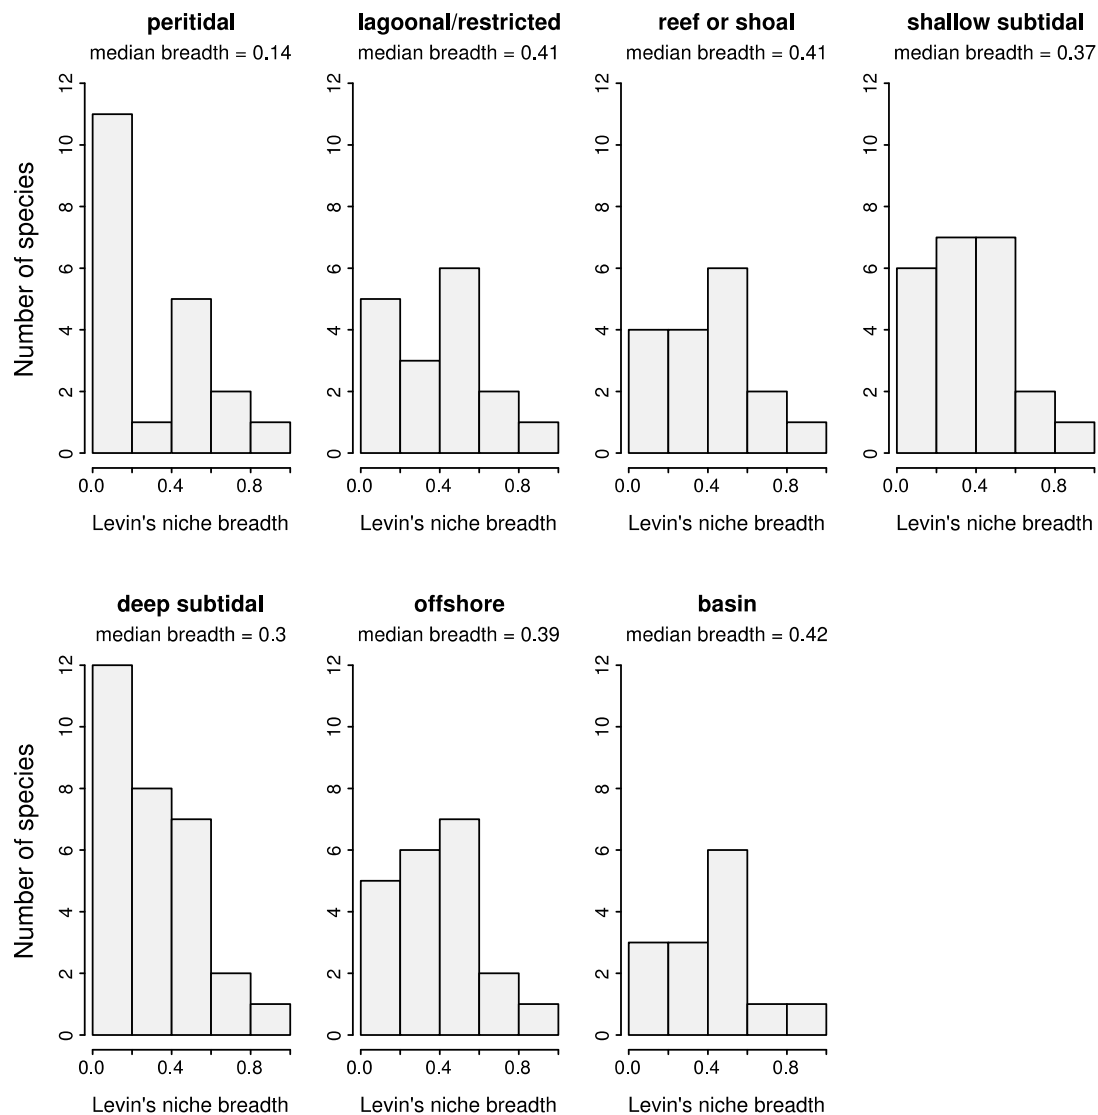

## Distribution of conodonts with different environmental ranges per environment

The plots show relative proportions of stenotopic and eurytopic taxa in each zone. E.g. in the peritidal zone the distribution is strongly bimodal: strict specialists occupying only one environment and eurytopic species occurring in all seven environments are the two most common groups.

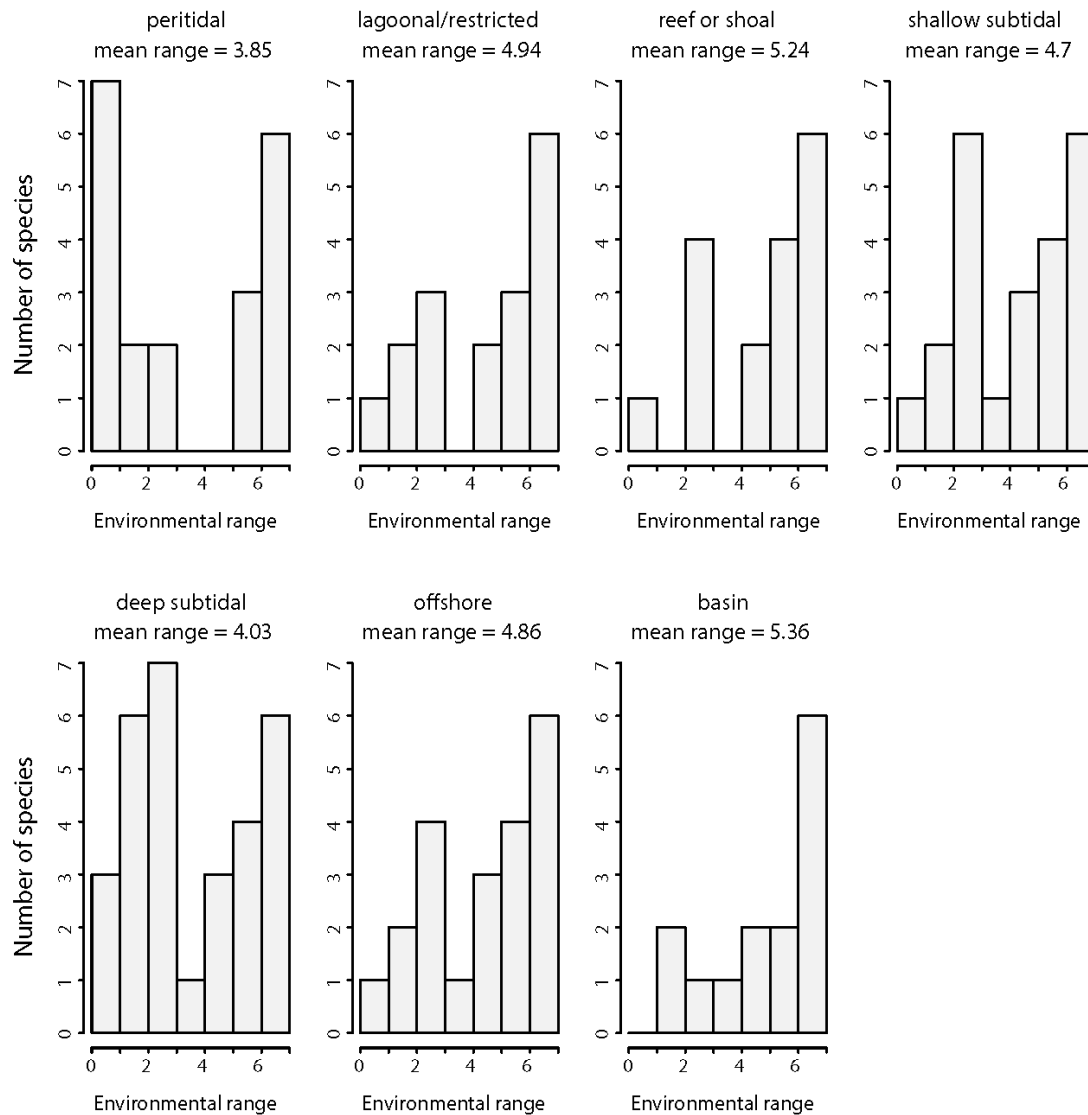

Supplement: Supplementary file 1 [file 23302562]
